# Supplementary material for: Truncated O‐glycans promote epithelial‐to‐mesenchymal transition and stemness properties of pancreatic cancer cells
Source: PubMed Central journal article supplement (PMC6787448; doi:10.1111/jcmm.14572), 2019-08-07

## Supplementary Information

### Supplementary Table 1

| Gene      | Primer                                                           |
|-----------|------------------------------------------------------------------|
| COSMC     | 5'-CACTGTGACAAAGCAGA-3' (F)<br>5'-GGTTGGGGTGATAAGTCA-3' (R)      |
| C1GALT1C1 | 5'-GCGGCTGCCAGAGAAGCAA-3' (F)<br>5'-AGGGCCGGTCATAACCCAGCA-3' (R) |
| GAPDH     | 5'-GCCTTCCGTGTCCCCACTGC-3' (F)<br>5'-GCTCTTGCTGGGGCTGGTGG-3' (R) |

#### List of cDNA specific PCR primers used for the study

### Supplementary Table 2

#### Details of antibodies used for the study

| Anti-body    | Host species | Vendor                             | Cat.No    | Dilution |
|--------------|--------------|------------------------------------|-----------|----------|
| C1GalT1      | Mouse        | Santa Cruz Biotechnology, CA, USA  | sc-100745 | 1:1000   |
| E-cadherin   | Rabbit       | Cell Signaling Technology, MA, USA | 24E10     | 1:1000   |
| Claudin      | Rabbit       | Cell Signaling Technology, MA, USA | D5H1D     | 1:1000   |
| Occludin     | Mouse        | Santa Cruz Biotechnology, CA, USA  | sc-133256 | 1:500    |
| $\alpha$ SMA | Rabbit       | Cell Signaling Technology, MA, USA | D4K9N     | 1:1000   |
| N-cadherin   | Rabbit       | Cell Signaling Technology, MA, USA | D4R1H     | 1:1000   |
| Snail        | Rabbit       | Cell Signaling Technology, MA, USA | C15D3     | 1:1000   |
| Slug         | Rabbit       | Cell Signaling Technology, MA, USA | C19G7     | 1:1000   |
| Vimentin     | Rabbit       | Cell Signaling Technology, MA, USA | D21H3     | 1:1000   |
| MMP2         | Rabbit       | Cell Signaling Technology, MA, USA | D4M2N     | 1:2000   |
| MMP9         | Rabbit       | Cell Signaling Technology, MA, USA | D6O3H     | 1:1000   |
| GAPDH        | Rabbit       | Cell Signaling Technology, MA, USA | 14C10     | 1:5000   |

|                |       |                                    |         |        |
|----------------|-------|------------------------------------|---------|--------|
| $\beta$ -actin | Mouse | Cell Signaling Technology, MA, USA | 8H10D10 | 1:5000 |
|----------------|-------|------------------------------------|---------|--------|

### **Supplementary Figure legends**

**Supplementary Figure 1. Quantification of Western blotting results.** The band intensity of each protein was analyzed by NIH ImageJ software and the fold change was calculated by normalizing with respective loading control ( $\beta$ -actin and GAPDH). Each experiments was performed in triplicate. Statistical significance between groups was analyzed by Two-way ANOVA. *p* value less than 0.05 was considered as statistically significant.

**Supplementary Figure 2. A.** The incidence of tumor metastasis was compared between T3M4 WT and SC cells implanted tumor bearing animals by the Fisher's two-tailed exact test.

# Supplementary Figure 1

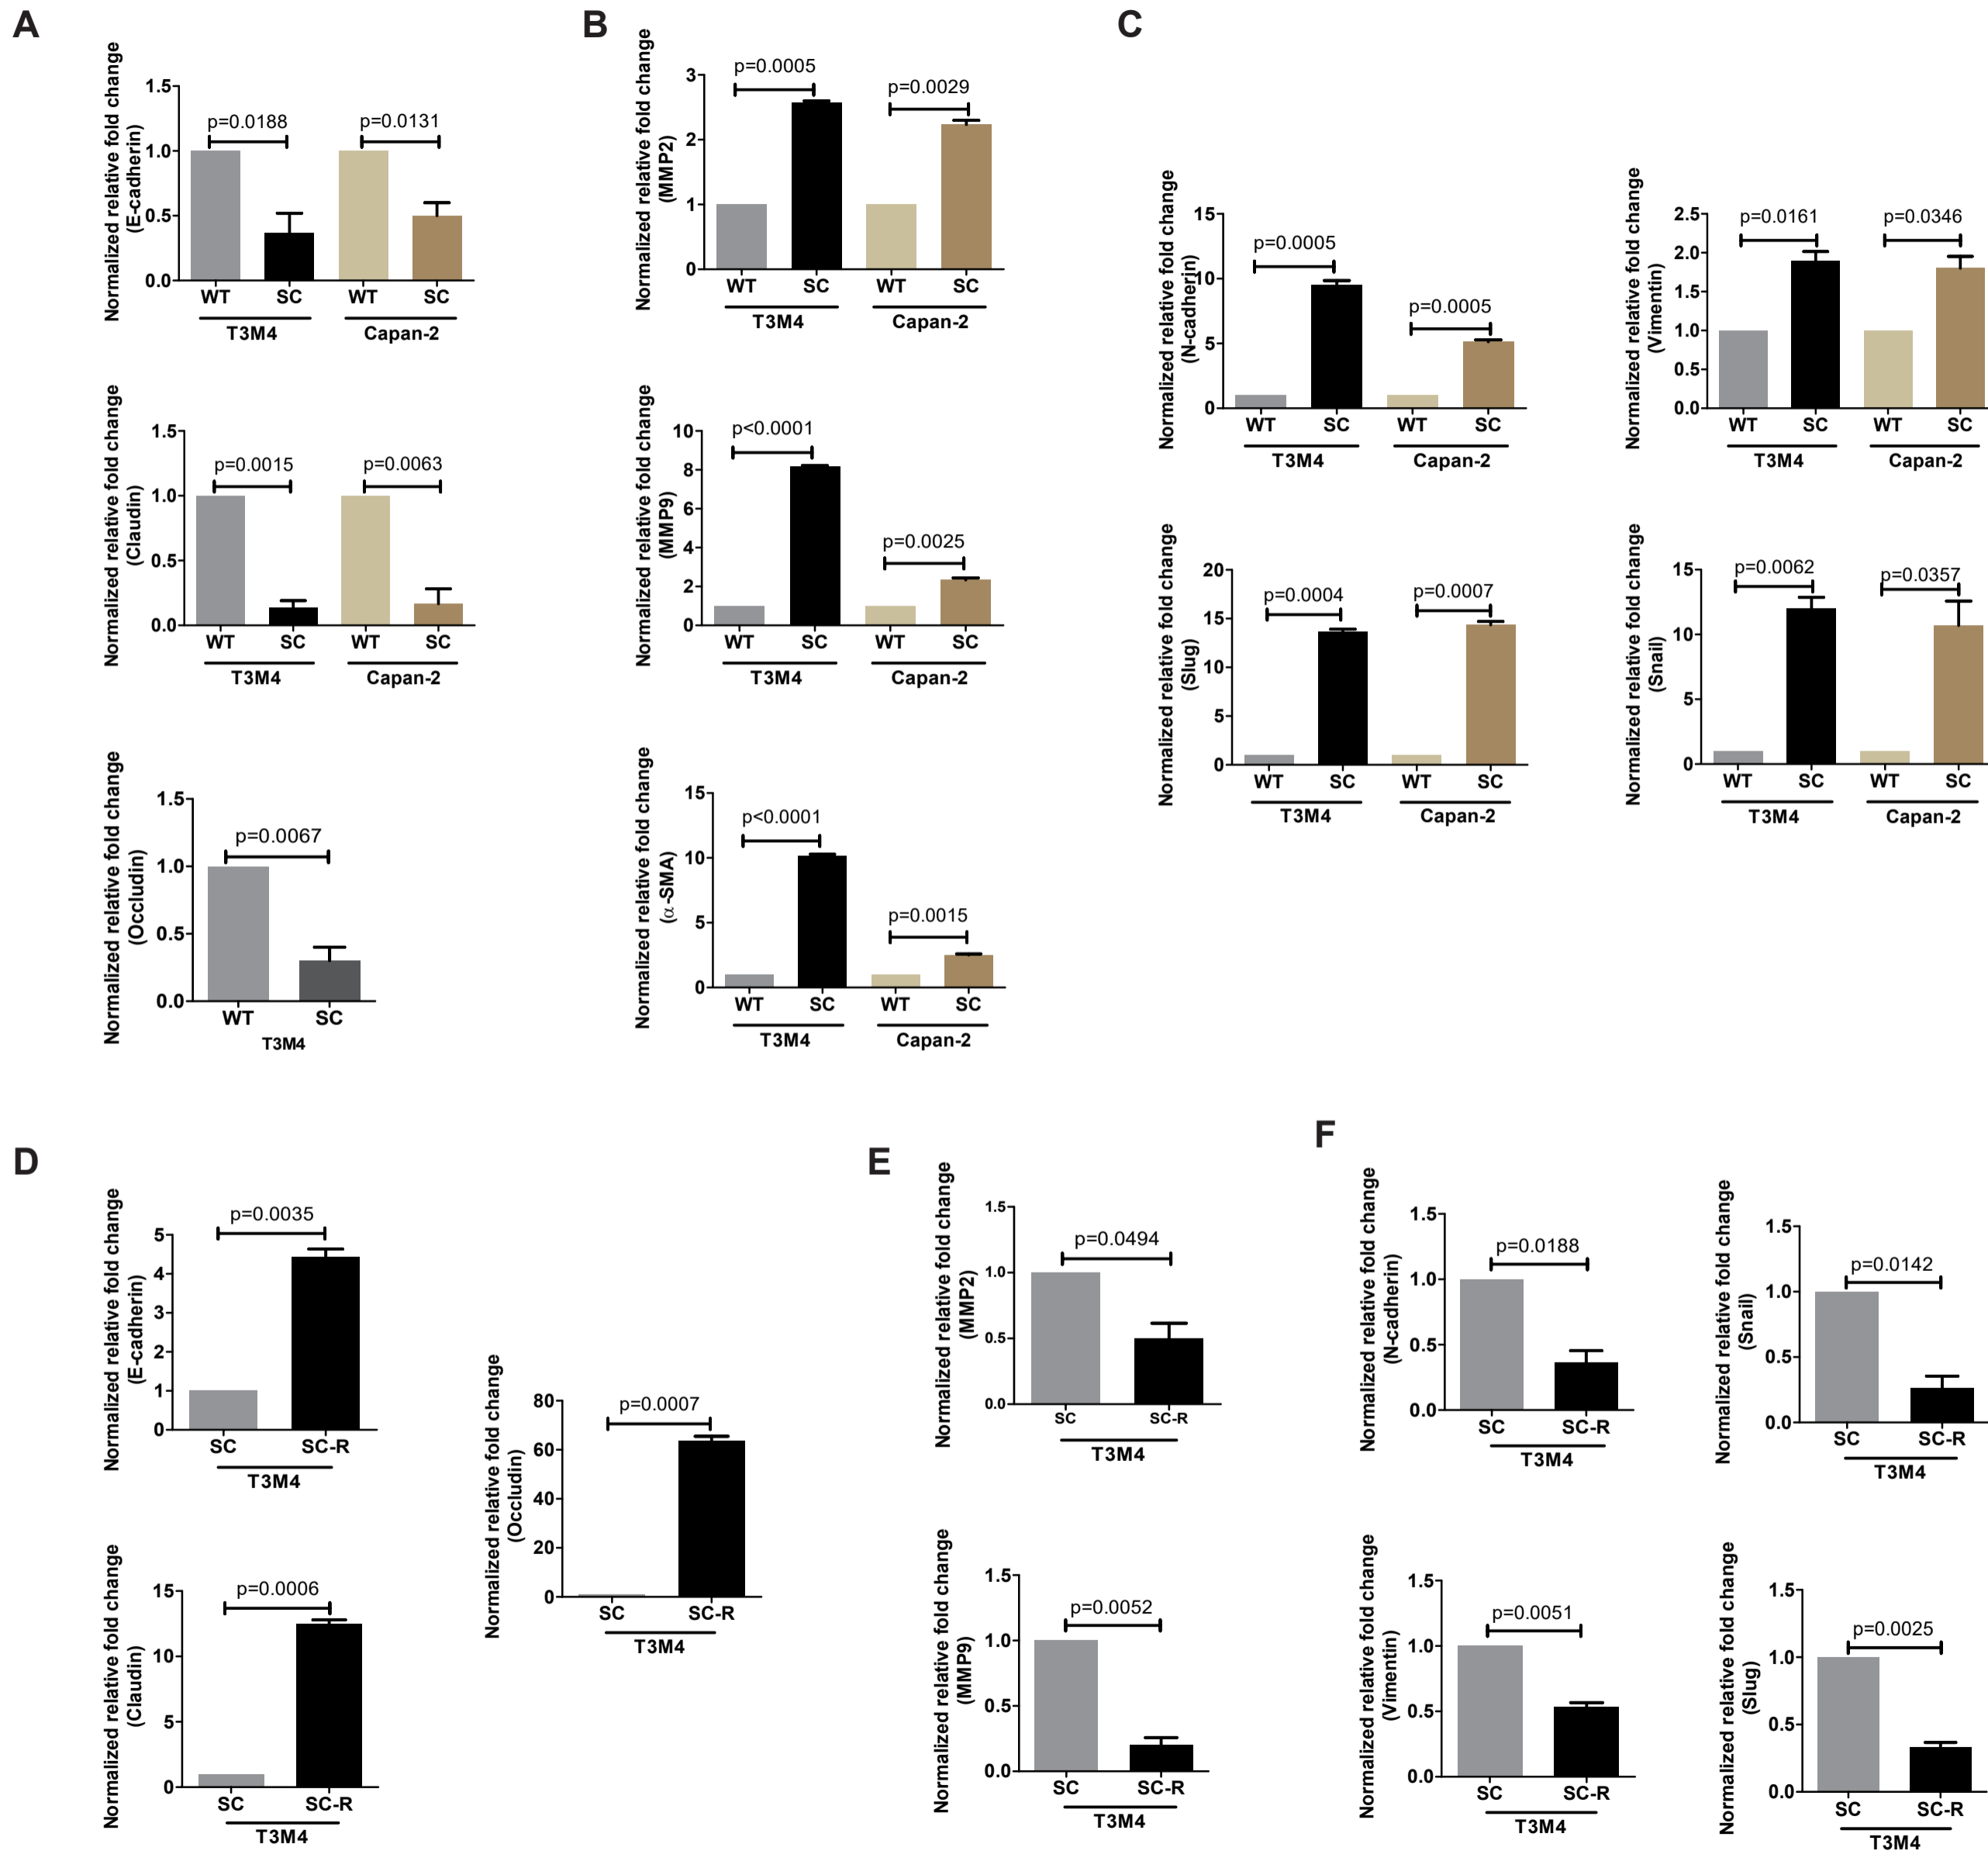

## Supplementary Figure 2

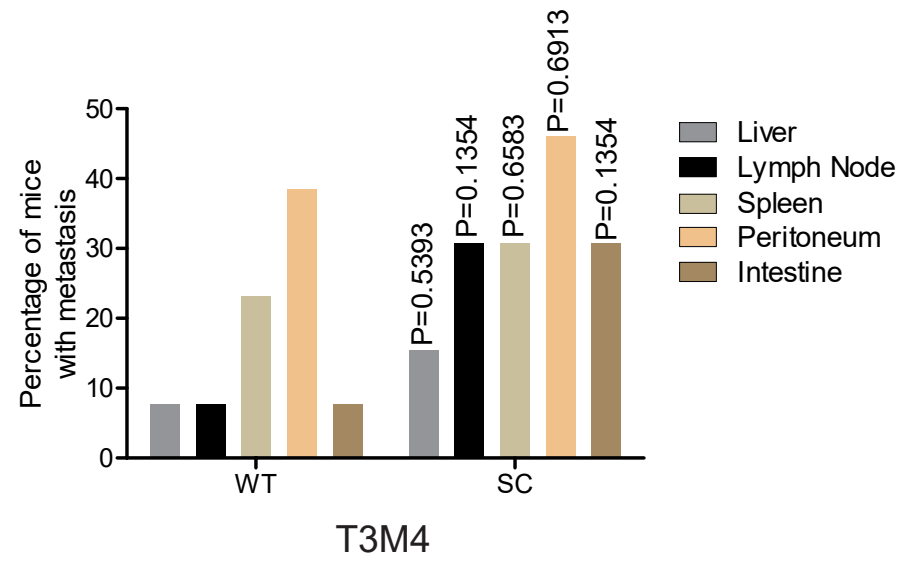

Supplement: JCMM-23-6885-s001.pdf [file JCMM-23-6885-s001.pdf]
